# Supplementary material
Source: MDPI journal article supplement (https://www.mdpi.com/2227-9040/11/6/328)
Supplement: s1 [file s1]

## Plasma Sputtered Growth of Ni-Pd Bimetallic Nanoparticles on Carbon Nanotubes for Toluene Sensing

Selene Acosta <sup>1</sup>, Juan Casanova-Chafer <sup>2,3</sup>, Eduard Llobet <sup>3</sup>, Axel Hemberg <sup>4</sup>, Mildred Quintana <sup>5,6</sup>, and Carla Bittencourt <sup>2,\*</sup>

<sup>1</sup> CONACYT-Centro de Investigación en Ciencias de la Salud y Biomedicina, Universidad Autónoma de San Luis Potosí, Av. Sierra Leona 550, Lomas de San Luis, 78210, San Luis Potosí, México

<sup>2</sup> Chimie des Interactions Plasma Surface, Institute for Materials Science and Engineering, Université de Mons, Place du Parc 23, 7000, Mons, Belgium

<sup>3</sup> Departament d'Enginyeria Electronica, Universitat Rovira i Virgili, Països Catalans 26, 43007 Tarragona, Spain

<sup>4</sup> Materia Nova Research Center, 7000 Mons, Belgium; Axel.hemberg@materianova.be

<sup>5</sup> Centro de Investigación en Ciencias de la Salud y Biomedicina, Universidad Autónoma de San Luis Potosí, Av. Sierra Leona 550, Lomas de San Luis, 78210, San Luis Potosí, México

<sup>6</sup> Facultad de Ciencias, Universidad Autónoma de San Luis Potosí, Av. Parque Chapultepec 1570, privadas del Pedregal, 78295, San Luis Potosí, México.

\*Correspondence: carla.bittencourt@umons.ac.be

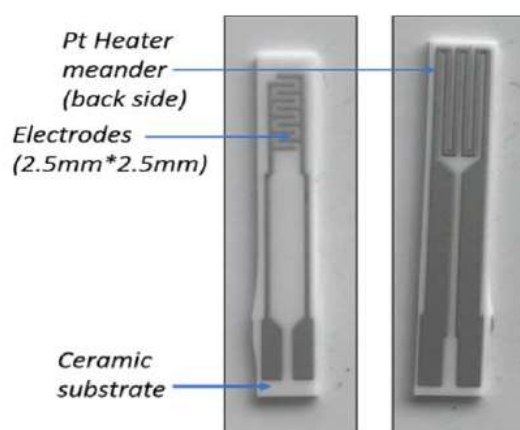

**Figure S1.** Commercially alumina substrates (CeramTech, GmbH) used for gas sensing tests.

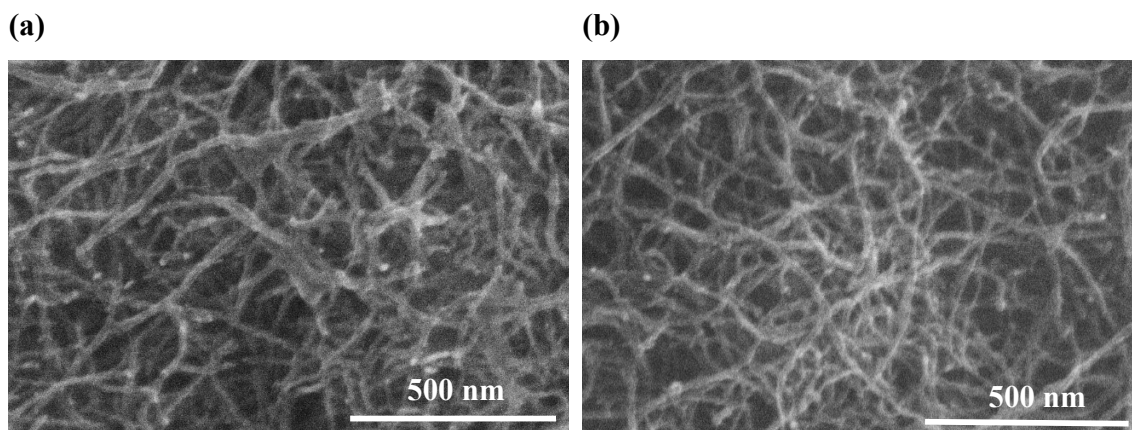

**Figure S2.** FESEM images of 5-Ni-Pd-OxCNTs **(a)** and 30-Ni-Pd-OxCNTs **(b)**. Bright spots reveal the presence of bimetallic nanoparticles.

**Table S1.** Relative atomic concentration of elements on CNTs samples before and after deposition of Pd and Ni-Pd nanoparticles. Data obtained from XPS analysis.

| Sample           | Relative Atomic Concentration (at. %) |        |           |        |
|------------------|---------------------------------------|--------|-----------|--------|
|                  | Carbon                                | Oxygen | Palladium | Nickel |
| Pristine-CNTs    | 92.1                                  | 7.9    | -         | -      |
| Ox-CNTs          | 77.9                                  | 22.1   | -         | -      |
| Pd-Ox-CNTs       | 72.0                                  | 25.8   | 2.2       | -      |
| 5-Ni-Pd-Ox-CNTs  | 66.3                                  | 30.1   | 2.8       | 0.8    |
| 10-Ni-Pd-Ox-CNTs | 65.4                                  | 29.8   | 2.9       | 1.9    |
| 30-Ni-Pd-Ox-CNTs | 65.3                                  | 27.6   | 1.3       | 5.8    |

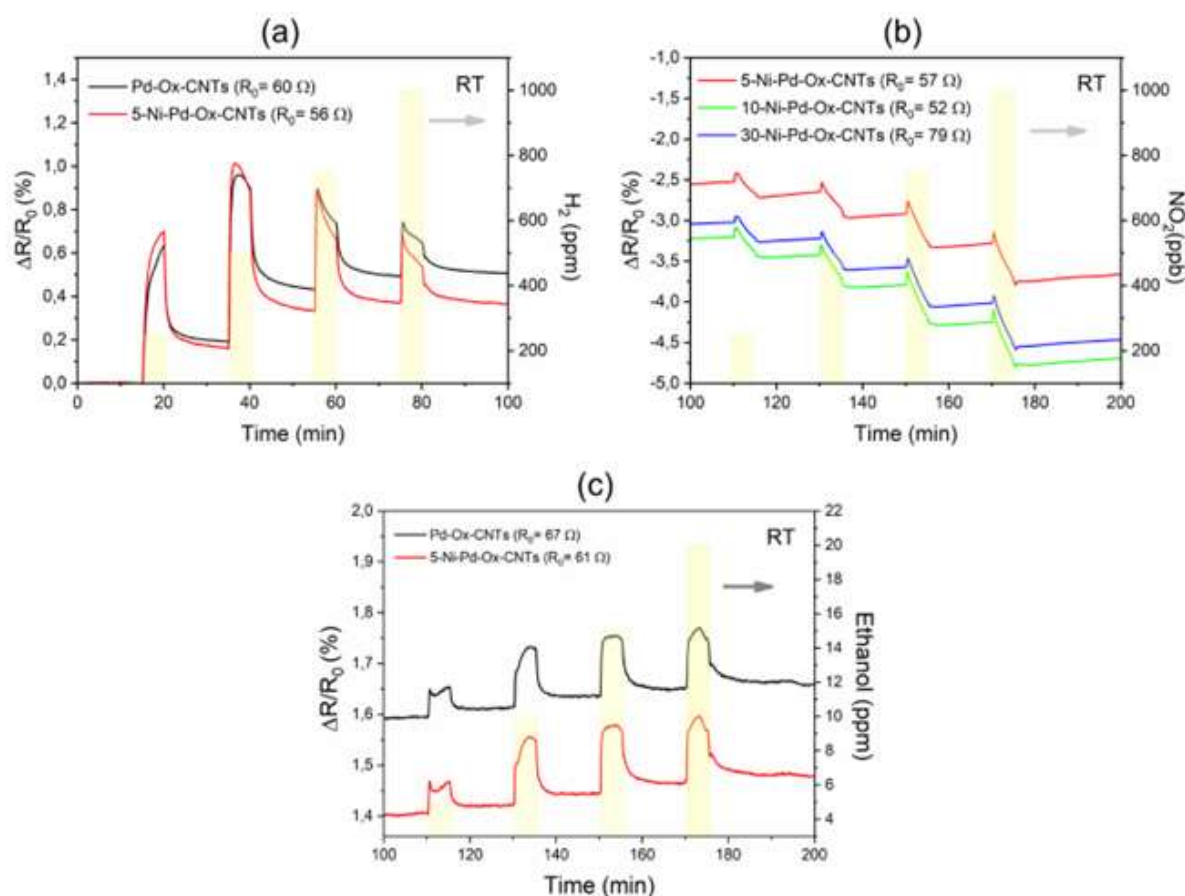

**Figure S3.** Response and recovery curves of Pd-Ox-CNTs and Ni-Pd-Ox-CNT active layers for a variable concentration of (a) H<sub>2</sub>; (b) NO<sub>2</sub>; (c) Ethanol. The measurements were carried out at room temperature. The samples not shown in each graph did not respond to that specific gas.

**Table S2.** Linear equations for the calibration curves for the four sensors tested.

| Sample                  | Linear Fit           |
|-------------------------|----------------------|
| <b>Pd-Ox-CNTs</b>       | $y = 0.129 + 0.050x$ |
| <b>5-Ni-Pd-Ox-CNTs</b>  | $y = 0.116 + 0.044x$ |
| <b>10-Ni-Pd-Ox-CNTs</b> | $y = 0.007 + 0.025x$ |
| <b>30-Ni-Pd-Ox-CNTs</b> | $y = 0.037 + 0.042x$ |

**Table S3.** FWHM and position of the components used to reproduce the Ni2p spectra.  
% relative contribution to the peak intensity.

|                         | <b>Ni<sup>0</sup></b> | <b>Ni<sup>2+</sup></b> | <b>Ni<sup>3+</sup></b> | <b>Satellite</b> |
|-------------------------|-----------------------|------------------------|------------------------|------------------|
| <b>5-Ni-Pd-Ox-CNTs</b>  |                       |                        |                        |                  |
| <b>FWHM</b>             | 1.5                   | 2.0                    | 2.0                    | 5.0              |
| <b>Position</b>         | 853.3                 | 856.0                  | 857.9                  | 861.4            |
| <b>%</b>                | 13%                   | 37%                    | 13%                    | 37%              |
| <b>10-Ni-Pd-Ox-CNTs</b> |                       |                        |                        |                  |
| <b>FWHM</b>             | 2.0                   | 2.1                    | 2.2                    | 5.0              |
| <b>Position</b>         | 853.1                 | 856.1                  | 858.4                  | 862.2            |
| <b>%</b>                | 3%                    | 40%                    | 13%                    | 44%              |
| <b>30-Ni-Pd-Ox-CNTs</b> |                       |                        |                        |                  |
| <b>FWHM</b>             | 2.2                   | 2.1                    | 2.2                    | 5.0              |
| <b>Position</b>         | 853.8                 | 856.0                  | 858.2                  | 861.9            |
| <b>%</b>                | 5%                    | 40%                    | 11%                    | 44%              |
